# Supplementary material for: Naringenin activates beige adipocyte browning in high fat diet-fed C57BL/6 mice by shaping the gut microbiota
Source: Royal Society of Chemistry journal article supplement (doi:10.1039/d2fo01610a), 2022-01-01
Supplement: d2fo01610a1.pdf [file d2fo01610a1.pdf]

S-Table 1. The sequences of the primers used for quantitative real-time PCR

| Genes          | Forward                  | Reverse                  |
|----------------|--------------------------|--------------------------|
| PRDM16         | cagcaacctccagcgtcacatc   | gcgaaggtcttgccacagtacg   |
| TBX1           | caccaaggcaggcagacgaatg   | ctacgggcacaaagtccatgagc  |
| CPT1a          | agccagactcctcagcagcag    | caccatagccgtcatcagcaacc  |
| MCAD           | cgaagagttggcgtatgggtgtac | catcattggctgctccgtcatcc  |
| PPAR $\alpha$  | acgatgctgtcctcctgatgaac  | gatgtcacagaacggcttctcag  |
| PGC1 $\alpha$  | gtgccaccgccaaccaagag     | ttctcgtgtcctcggtgag      |
| ATGL           | acaccagcatccagttcaacctc  | gtccatctctgtagccctgtttgc |
| HSL            | gcacggcggtgttctaatgtc    | cgttggctggtgtctctgtgtc   |
| TFAM           | tgtggagggagctaccagaagc   | gtctctgccgggctcctc       |
| NRF1           | tctgctgtggctgatggagagg   | gatgcttgcgtcgtctggatgg   |
| NRF2           | caaccggaagcacgctgaagg    | ggacgctcggctgggactc      |
| TMEM26         | cctggtcggcgtctggagag     | gcctcgtccgcgcttgaac      |
| CD137          | gctgctgctagtgggctgtg     | cagttcggtgtccacctatgc    |
| HOXC8          | gcaagagggcagcgtggtg      | tgaggctgggagacgagttctg   |
| UCP1           | caccacactcctggcctctcc    | acatggacatcgcacagcttgg   |
| Cidea          | ggagaccgccaggactacg      | agggcgagctggatgtatgagg   |
| $\beta$ -actin | gtcctcaccctccaaaag       | gctgcctcaacacctcaacc     |

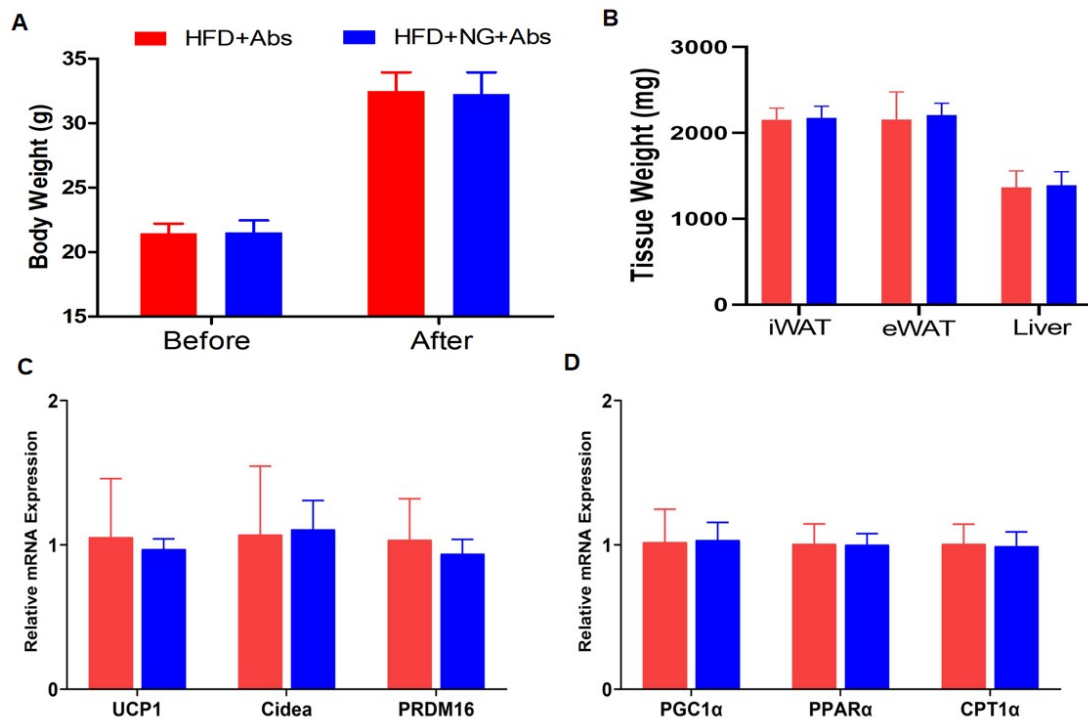

S-Figure 1. Effects of antibiotics treatment on body weight and browning in NG treated HFD fed mice. (A) Body weight for each group mice (n = 6). (B) The weight of iWAT, eWAT and liver (n = 6). (C) The expression of thermogenic-related genes (UCP1, PRDM16, and Cidea) in iWAT for each group mice (n = 4). (D) The expression of fatty acid oxidation-related genes (PGC1 $\alpha$ , PPAR $\alpha$ , CPT1 $\alpha$ ) in iWAT for each group mice (n = 4). Results are presented as mean  $\pm$  SD.
